# Supplementary material for: Profitable biomethane production from delignified rice straw biomass: the effect of lignin, energy and economic analysis
Source: Royal Society of Chemistry journal article supplement (doi:10.1039/d0gc02738c), 2020-01-01
Supplement: d0gc02738c1.pdf [file d0gc02738c1.pdf]

## Electronic supplementary information

### Profitable biomethane production from delignified rice straw biomass: Effect of lignin, Energy and economic analysis

Kavitha S <sup>a</sup>, Yukesh Kannah R <sup>a</sup>, Kasthuri S <sup>a</sup>, Gunasekaran M <sup>b</sup>, Arulazhagan Pugazhendi <sup>c</sup>, Eldon R. Rene <sup>d</sup>, Deepak Pant<sup>e</sup>, Gopalakrishnan Kumar <sup>f,g\*</sup>, J. Rajesh Banu <sup>h\*\*</sup>

<sup>a</sup> Department of Civil Engineering, Anna University Regional Campus, Tirunelveli 627007, Tamil Nadu, India.

<sup>b</sup> Department of Physics, Anna University Regional Campus, Tirunelveli 627007, Tamil Nadu, India

<sup>c</sup> Centre of Excellence in Environmental Studies, King Abdulaziz University, Jeddah 21589, Saudi Arabia

<sup>d</sup> Department of Environmental Engineering and Water Technology, IHE Delft Institute for Water Education, Westvest 7, 2601DA Delft, the Netherlands

<sup>e</sup>Sustainable Chemistry, Flemish Institute for Technological Research, VITO, Belgium

<sup>f\*</sup> School of Civil and Environmental Engineering, Yonsei University, Seoul 03722, Republic of Korea

<sup>g\*</sup>Institute of Chemistry, Bioscience and Environmental Engineering, Faculty of Science and Technology, University of Stavanger, Box 8600 Forus, 4036 Stavanger, Norway

<sup>h\*\*</sup>Department of Life Sciences, Central University of Tamil Nadu, Neelakudi, Thiruvavur 610005, Tamil Nadu, India

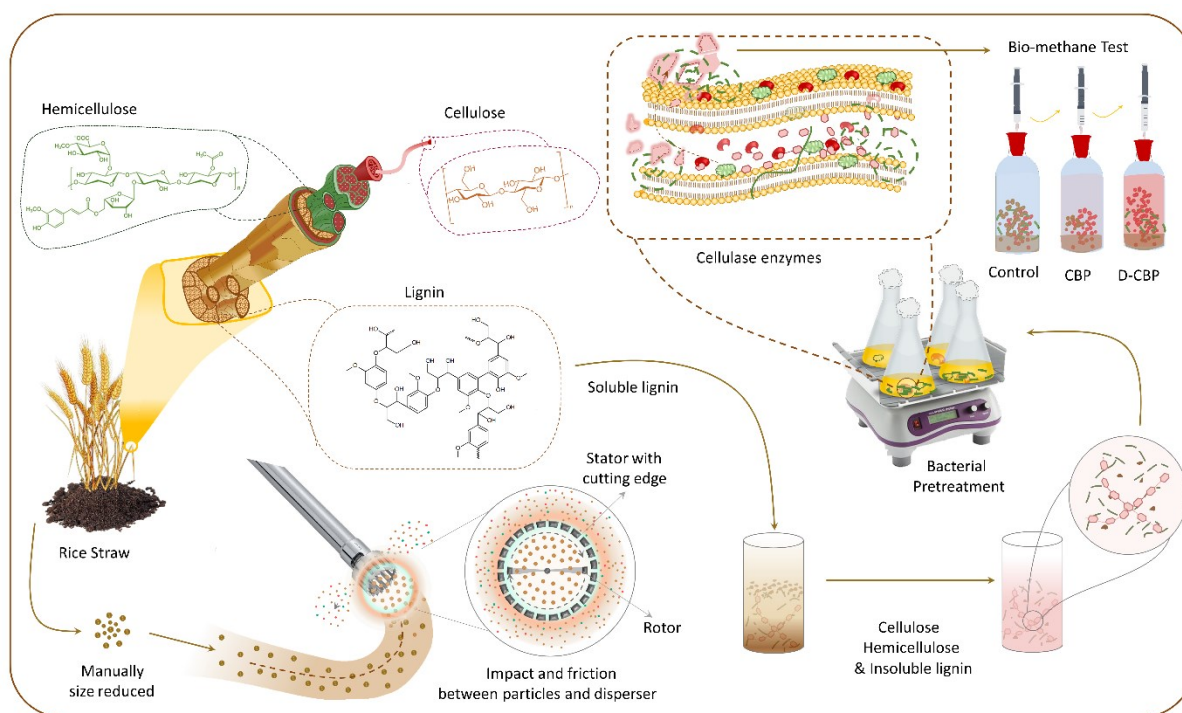

**Fig s1** Methodology flow chart of the present study
